# Supplementary material for: Novel High-throughput Approach for Purification of Infectious Virions
Source: PubMed Central journal article supplement (PMC5101806; doi:10.1038/srep36826), 2016-11-09
Supplement: srep36826-s1.pdf [file srep36826-s1.pdf]

# Novel High-throughput Approach for Purification of Infectious Virions

Kevin T. James<sup>1</sup>, Brad Cooney<sup>2</sup>, Kate Agopsowicz<sup>3#</sup>, Mary Ann Trevors<sup>4#</sup>, Adil Mohamed<sup>1</sup>, Don Stoltz<sup>4</sup>, Mary Hitt<sup>3</sup>, Maya Shmulevitz<sup>1\*</sup>,

<sup>1</sup>Department of Medical Microbiology and Immunology, Li Ka Shing Institute of Virology, University of Alberta, Edmonton, Alberta, Canada.

<sup>2</sup>GE Healthcare Canada, [brad.cooney@ge.com](mailto:brad.cooney@ge.com).

<sup>3</sup>Department of Oncology, University of Alberta, Edmonton, Alberta, Canada

<sup>4</sup>Department of Microbiology and Immunology, Dalhousie University, Halifax, Nova Scotia, Canada

#Authors contributed equally to this work

**Running Head:** High-throughput Virus Purification

\*Address correspondence to Maya Shmulevitz, [shmulevi@ualberta.ca](mailto:shmulevi@ualberta.ca).

## Supplementary Materials and Methods:

### Virus purification by CsCl, Reovirus purification on Capto Core 700 chromatography columns, and Capto Core 700 slurry

#### (A) Purification by CsCl Gradient Ultracentrifugation

- *This protocol is according to 1L cultures. For 500ml cultures, use 1/2 vol.*
  - *Proceed on ice.*
  - *During sonication, do not let suspension froth.*
  - *Store virus at 4°C, or aliquot and store at -20°C for long-term usage. Avoid freeze-thaw cycles.*
1. Resuspend cell pellet in 18ml of HO Buffer.
  2. (Optional) Add Sodium Deoxycholate (10% solution in water) to a final concentration of 0.2%.
  3. Vortex 5 minutes.
  4. Incubate on ice for 20 minutes.
  5. Add 18ml of Vertrel™ XF.
  6. Sonicate on amplitude 70% for two pulses of 5 seconds each.
  7. Subject sample to centrifugation at 4000 RPM for 10 minutes.
  8. Transfer the top aqueous phase to a new tube.
  9. Repeat steps 5-8.
  10. Layer aqueous phase onto CsCl Gradient as follows:
    - 1/4<sup>th</sup> final volume of CsCl 1.4 g/cc
    - 1/4<sup>th</sup> final volume of CsCl 1.2 g/cc
    - 1/2 final volume of CsCl of aqueous phase from extraction above
  11. Subject sample to high speed centrifugation at 112,500 x g for 5-18 hours.
  12. To collect virus band, either (1) puncture tube with a 5 ml syringe and a needle below the band of interest, and slowly draw the virus into the syringe, or (2) slowly remove liquid using a p1000 pipettor from the top of the tube until the band of interest is reached, and collect.
  13. Load virus into dialysis tubing (10 kD MWCO).
  14. Dialyze against 3 sets of virus dilution buffer (VDB), first for >1 hour, then >3 hours, then >6 hours.
  15. Collect virus from dialysis membrane.

□

#### (B) Purification by Capto700 Chromatography

- *This protocol is according to 1L cultures. For 500ml cultures, use 1/2 vol.*
- *Proceed on ice.*
- *During sonication, do not let suspension froth.*
- *Store virus at 4°C, or aliquot and store at -20°C for long-term usage. Avoid freeze-thaw cycles.*

1. Resuspend infected cell pellet in 6.5ml of Virus Dilution Buffer.
  2. Vortex 2 minutes.
  3. Let lysate sit on ice for 2 minutes.
  4. Add 6.5ml of Vertrel™ XF.
  5. Vortex 2 minutes.
  6. Sonicate on amplitude 70% for two pulses of 5 seconds each.
  7. Subject sample to centrifugation at 4000 RPM for 10 minutes.
  8. Transfer the top aqueous phase to a new tube.
  9. Filter through 0.45µm GD/x filter.
  10. Pass sample through a Capto700 Column (e.g. AKTA Start chromatography system or a comparable Chromatography system) as follows:
    - a) Attach Capto Core 700 1ml column via “drop to drop” connection to avoid introduction of air on to the column.
    - b) Flush column at ~1ml/min with ddH<sub>2</sub>O until stable UV and Conductivity.
    - c) Add sample via Sample Loop or add larger samples via Sample Inlet.
    - d) Add the A buffer line into Virus Dilution Buffer.
    - e) Equilibrate the column using Virus Dilution Buffer until Conductivity and UV are stable.
    - f) Set fraction collector to collect 0.5ml fractions.
    - g) Load sample onto the column.
    - h) Virus should appear in the first 5-10 fractionation tubes, as indicated by a rise in UV and should be validated by other methods (e.g. western blot analysis, plaque titration, etc.).
    - i) Clean the column to permit reuse with 3-5 column volumes of 30% Isopropanol and 1.0M NaOH.
  11. (Optional) Concentrate virus using VivaSpin (100 kD MWCO) sample concentrators.
- 

### (C) Purification Capto700 Slurry

- *This protocol is per 6 x 10<sup>6</sup> cells infected with reovirus as in (A) or 1 x 10<sup>7</sup> infected cells with adenovirus.*
  - *This protocol is scalable to larger or smaller cell lysates. Adjust volumes according to relative number of cells.*
  - *Proceed on ice.*
  - *Do NOT add protease inhibitors, as they can sometimes interfere with reovirus infectivity.*
  - *To prepare 50% Capto700 Slurry, spin Capto700 resin at 800 x g for 5 minutes and wash 2 times with equal-to-resin volume of Virus Dilution Buffer. Store as 50% slurry in VDB.*
  - *Store virus at 4°C, or aliquot and store at -20°C for long-term usage. Avoid freeze-thaw cycles.*
1. Resuspend cell pellet in 350µl of Virus Dilution Buffer.
  2. Freeze-thaw 2 times.
  3. (Optional) Add 350µl of Vertrel™ XF, vortex for 2 minutes, spin at 1000 x g for 10 minutes, and transfer top aqueous phase. If choosing this option, proceed to step 12.
  4. Remove nuclei and debris by centrifugation at 800 x g for 10 minutes.

5. Add 50-100µl of 50% Capto700 Slurry.
6. Mix sample end-over-end for 45 minutes at room temperature.
7. Subject sample to centrifugation at 800 x g for 10 minutes.
8. Transfer the top phase to a new tube.
9. Repeat steps 5-8, 1-2 times for increasing purity
10. (Optional) To clear all Capto700 resin, pass sample through an Illustra MicroSpin column at 800 x g for 5 minutes.

□

## RECIPES

### 1. JMEM L929 Suspension Culture Media

| REAGENT                                                     | Per L                         |
|-------------------------------------------------------------|-------------------------------|
| JMEM (Sigma-Aldrich, M0518) Powder                          | 11g                           |
| Sodium bicarbonate (NaHCO <sub>3</sub> )                    | 2.2g                          |
| HEPES (4-(2-hydroxyethyl)-1-piperazineethanesulfonic acid ) | 1.2g (or 1.3g if Sodium salt) |
| Glucose (or dextrose)                                       | 1g                            |
| ddH <sub>2</sub> O                                          | 900ml                         |

Mix Components. Adjust to pH 7.2 with 10N NaOH (~375µl of 10N NaOH per L). Add ddH<sub>2</sub>O to 1 L with water. Filter sterilize and store at 4°C.

### 2. Supplemented JMEM (JMEM<sup>+++</sup>)

| REAGENT                                        | Per 500ml       |
|------------------------------------------------|-----------------|
| FBS                                            | 25ml (5% final) |
| Non-Essential Amino Acids Solution 100X (NEAA) | 5ml             |
| Sodium Pyruvate                                | 5ml             |
| Antibiotic/Antimycotic                         | 5ml             |

Supplement JMEM when ready for use.

### 3. HO Buffer

| REAGENT        | Per 100ml | [Final] |
|----------------|-----------|---------|
| 1M Tris pH 7.4 | 1ml       | 10mM    |

|                          |            |       |
|--------------------------|------------|-------|
| 5M NaCl                  | 5ml        | 250mM |
| $\beta$ -mercaptoethanol | 67 $\mu$ l |       |
| ddH <sub>2</sub> O       | To 100ml   |       |

Filter sterilize through standard 0.45 $\mu$ m syringe filter.

#### 4. Virus Dilution Buffer (VDB) for reovirus

| REAGENT              | Per 1 L | [Final] |
|----------------------|---------|---------|
| 5M NaCl              | 30ml    | 150mM   |
| 1M MgCl <sub>2</sub> | 15ml    | 15mM    |
| 1M Tris pH 7.4       | 10ml    | 10mM    |
| ddH <sub>2</sub> O   | To 1L   |         |

Filter sterilize through standard 0.45 $\mu$ m bottle filter.

#### 5. Virus Dilution Buffer (VDB) for adenovirus

| REAGENT            | Per 1 L | [Final] |
|--------------------|---------|---------|
| 1M Tris pH 8.0     | 10ml    | 10mM    |
| ddH <sub>2</sub> O | To 1L   |         |

#### 6. CsCl Solutions

For 1.2g/cc, mix 33.3g CsCl with 100ml of 10mM Tris pH7.4

For 1.4g/cc, mix 67g CsCl with 100ml of 10mM Tris pH7.4

Stir solutions and allow them to reach room temperature. Using a calibrated scale, bring solutions to correct density by adding either CsCl or 10mM Tris pH7.4. Filter sterilize through standard 0.45 $\mu$ m bottle filter.

### ADDITIONAL REAGENTS and EQUIPMENT

| REAGENTS and EQUIPMENT          | Catalogue Number | Source                                           |
|---------------------------------|------------------|--------------------------------------------------|
| Vertrel™ XF fluorinated solvent | Vertrel™ XF      | Dymar Chemicals Ltd.,<br>Mississauga, ON, Canada |

|                                                                            |                         |               |
|----------------------------------------------------------------------------|-------------------------|---------------|
| AKTA Start                                                                 | 29-0220-94 + 29-0230-51 | GE Healthcare |
| Capto Core 700 1ml column                                                  | 17-5481-51 (5 pieces)   | GE Healthcare |
| 0.45µm Whatman filter<br>(regenerated Cellulose<br>GD/X filters)           | 6882-2504               | GE Healthcare |
| Capto Core 700 slurry<br>(25ml)                                            | 17-5481-01              | GE Healthcare |
| Illustra MicroSpin columns                                                 | 27-3565-01 (50 pieces)  | GE Healthcare |
| (Optional) VivaSpin 6<br>(100,000 MWCO) 2-6mls<br>sample concentrator      | 28-9323-19 (25 pieces)  | GE Healthcare |
| (Optional) VivaSpin 2<br>(100,000 MWCO) 400µl –<br>2ml sample concentrator | 28-9322-58 (25 pieces)  | GE Healthcare |

## REFERENCES

1. Bett, A.J., Haddara, W., Prevec, L. & Graham, F.L. An efficient and flexible system for construction of adenovirus vectors with insertions or deletions in early regions 1 and 3. *Proc Natl Acad Sci U S A* **91**, 8802-8806 (1994).
2. Ng, P., Parks, R.J., Cummings, D.T., Eveleigh, C.M. & Graham, F.L. An enhanced system for construction of adenoviral vectors by the two-plasmid rescue method. *Hum Gene Ther* **11**, 693-699 (2000).
3. Chaurasiya, O.S., Kumar, L. & Sethi, R.S. An infant with milky blood : an unusual but treatable case of familial hyperlipidemia. *Indian J Clin Biochem* **28**, 206-209 (2013).
